# Supplementary material for: Interactions between rheumatoid arthritis antibodies are associated with the response to anti-tumor necrosis factor therapy
Source: BMC Musculoskelet Disord. 2021 Apr 21;22:372. doi: 10.1186/s12891-021-04248-y (PMC8061050; doi:10.1186/s12891-021-04248-y)
Supplement: Supplementary file 1 — Additional file 1: Supplementary Table S1. Association results for the four antibodies and anti-TNF response at week 12 in the prospective cohort (independent effects). [file 12891_2021_4248_MOESM1_ESM.pdf]

**Title: Interactions between rheumatoid arthritis antibodies are associated with the response to anti-Tumor Necrosis Factor therapy.**

**Supplementary Table S1. Association results for the four antibodies and anti-TNF response at week 12 in the prospective cohort (independent effects).**

| <b>Variable</b>   | <b>Regression coefficient<br/>(95%CI)</b> | <b>P value</b> |
|-------------------|-------------------------------------------|----------------|
| Anti-CCP negative | Reference                                 | -              |
| Anti-CCP positive | -0.22 (-1.02 to 0.58)                     | 0.59           |
| RF negative       | Reference                                 | -              |
| RF positive       | -0.23 (-1.01 to 0.54)                     | 0.55           |
| Anti-CarP         | -1.07e-4 (-8e-4 to 6e-4)                  | 0.77           |
| Anti-PAD4         | -5.77e-6 (-2.1e-4 to 2.1e4)               | 0.96           |
| Baseline DAS28    | 0.42 (0.16 to 0.67)                       | 0.0015         |
| Sex: Female       | Reference                                 | -              |
| Sex: Male         | 0.19 (-0.60 to 0.99)                      | 0.62           |
| Age               | -0.017 (-0.041 to 0.0061)                 | 0.14           |

Multivariate linear regression analysis for anti-cyclic citrullinated peptide (CCP), rheumatoid factor (RF), anti-carbamylated protein (CarP) and anti-peptidylarginine deiminase type 4 (PAD4) antibodies with anti-TNF response (i.e. change in DAS28 from week 0 to week 12). Adjustment was performed for baseline DAS28, sex and age. None of the four antibodies were associated independently with the anti-TNF response. As expected, the baseline DAS28 was significantly associated with the change in DAS28. DAS28: 28-joint disease activity score; Reference: reference group.
